# Supplementary material for: Preparation and exceptional adsorption performance of porous MgO derived from a metal–organic framework
Source: Royal Society of Chemistry journal article supplement (doi:10.1039/c7ra00526a), 2017-01-01
Supplement: c7ra00526a1.pdf [file c7ra00526a1.pdf]

## Supporting information

### **Preparation and Exceptional Adsorption Performance of Porous MgO Derived from a Metal-Organic Framework**

**Xian-He Shi, Jin-Jin Ban, Li Zhang, Zhi-Peng Sun, Dian-Zeng Jia\*, Guan-  
Cheng Xu\***

Key Laboratory of Energy Materials Chemistry, Ministry of Education; Key Laboratory of  
Advanced Functional Materials, Autonomous Region; Institute of Applied Chemistry, Xinjiang  
University, Urumqi, 830046 Xinjiang, PR China.

\* Corresponding author. E-mail: xuguanchengxju@163.com; jdz@xju.edu.cn

## Experimental section

In the adsorption experiments of MgO towards CR, The absorbances of the CR solutions before and after adsorption were tested by using the spectrophotometer.  $C_0$  is the concentration of CR (mg/L) before adsorption. The  $C_e$  was obtained according to the Bill-Lambert law.

$$A = alc$$

$a$  is the absorption coefficient, is the nature of the material.

$l$  is the distance which the light passes through the sample.

$c$  is the solution concentration.

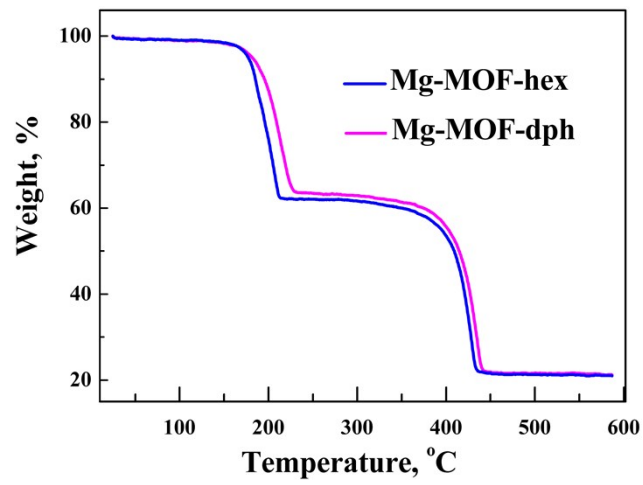

Fig. S1 TGA curves of Mg-MOF-hex and Mg-MOF-dhp.

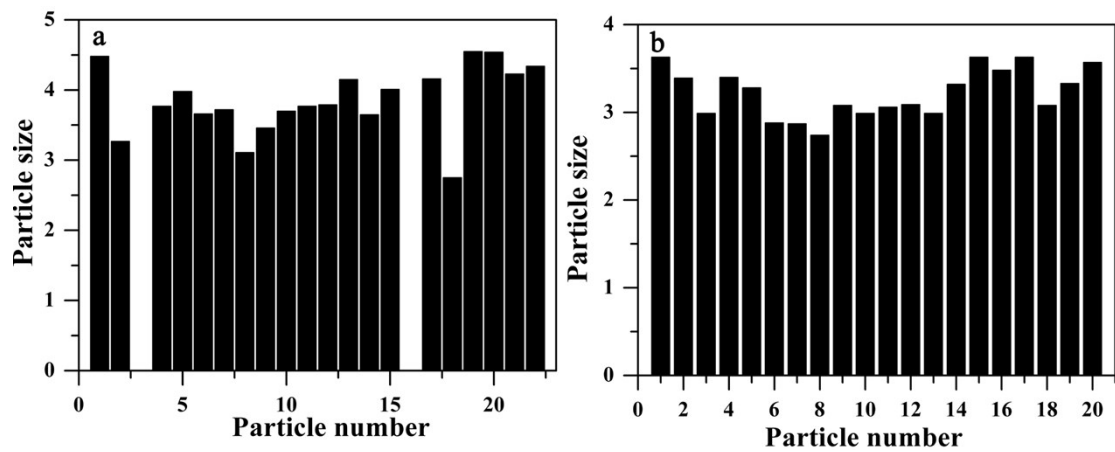

Fig. S2 The particle size and distribution of the Mg-MOF-hex (a) and Mg-MOF-dhp (b).

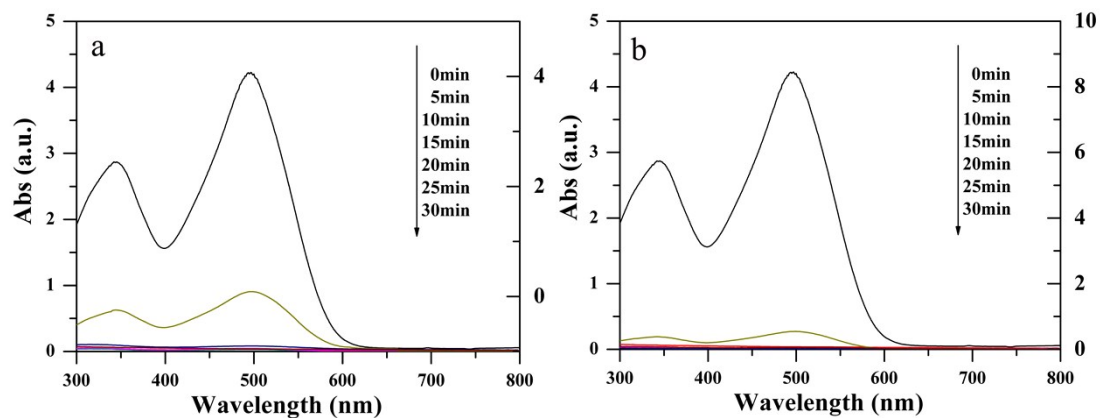

**Fig. S3** UV-vis adsorption spectra of CR solutions (250 mg/L) before and after being treated by 0.6 g/L MgO-hex (a) and MgO-dhp (b) for different time periods, respectively.

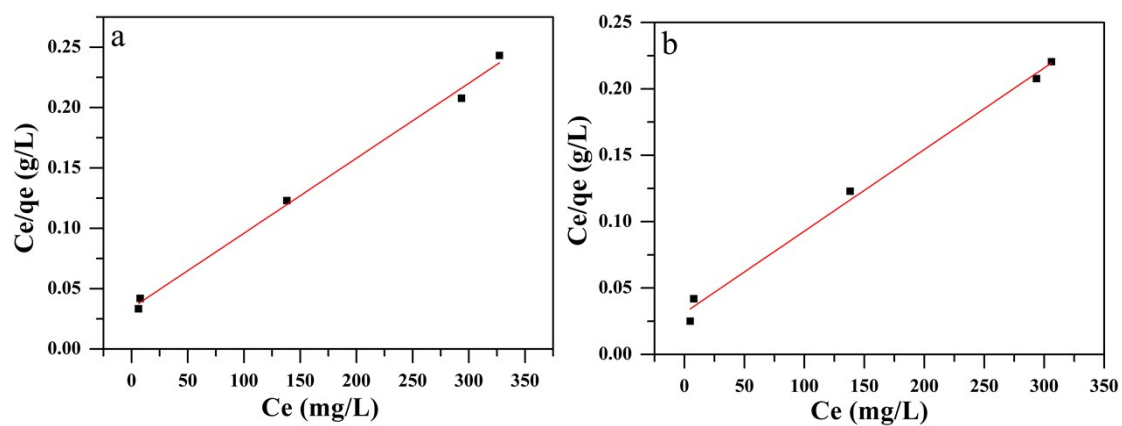

**Fig. S4** Fitting plots of Langmuir isotherm model for CR adsorption on MgO-hex (a) and MgO-dhp (b).

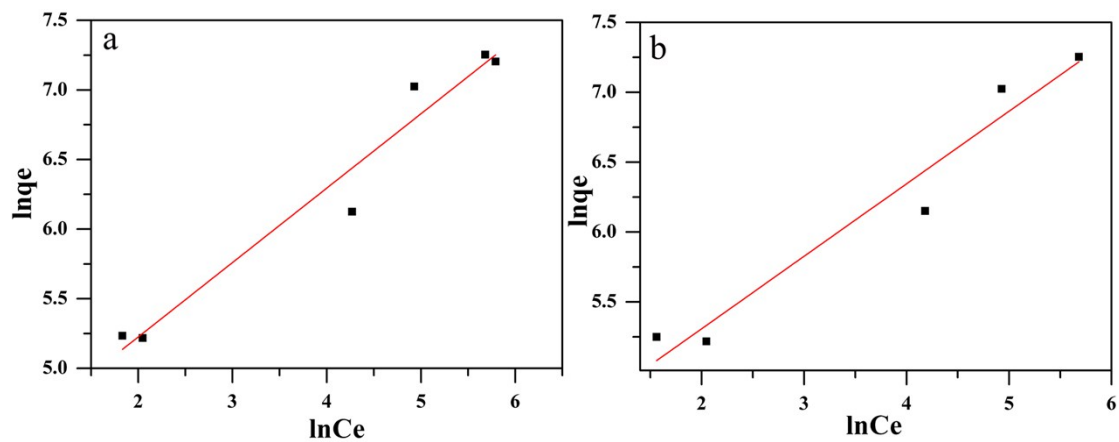

**Fig. S5** Fitting plots of Freundlich isotherm model for CR adsorption on MgO-hex (a) and MgO-dhp (b).

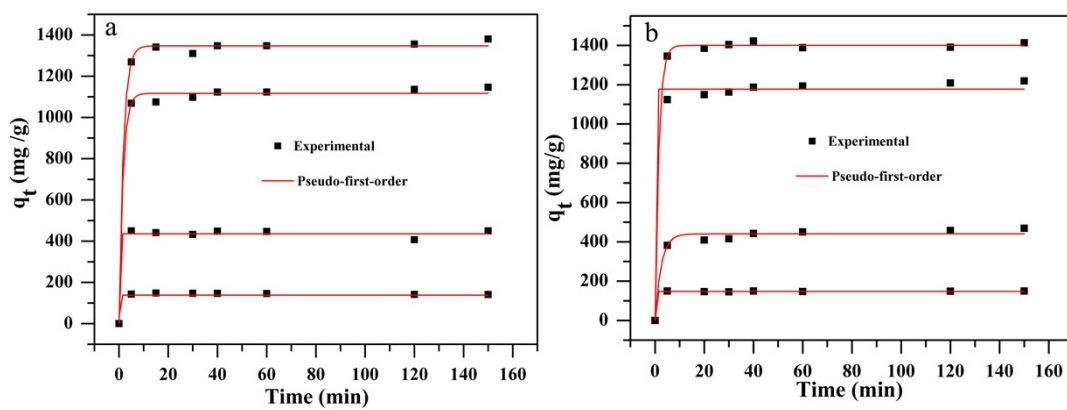

**Fig. S6** Pseudo-first-order kinetics plots of CR adsorption on MgO-hex (a) and MgO-dhp (b).

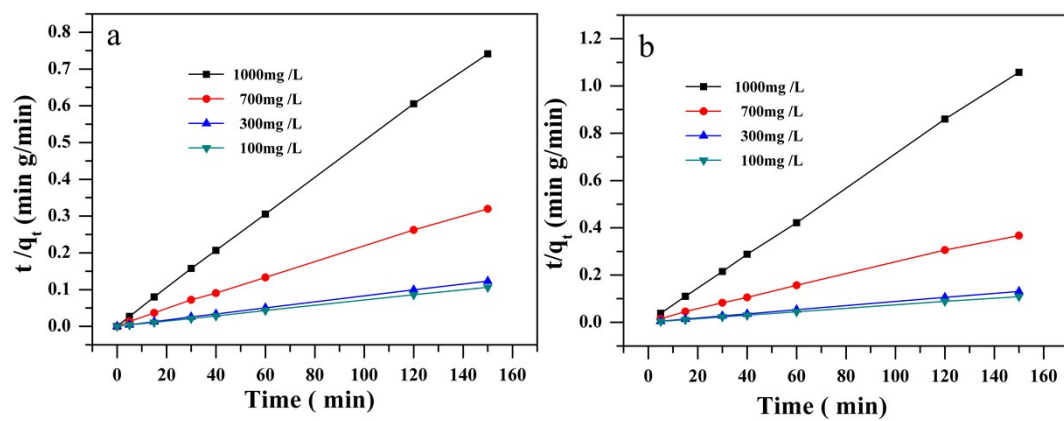

Fig. S7 Pseudo-second-order kinetics plots of CR adsorption on MgO-hex (a) and MgO-dhp (b).

Table S1 Adsorption parameters of isotherm for CR adsorption on MgO-hex

| Langmuir     |        |       | Freundlich |      |       |
|--------------|--------|-------|------------|------|-------|
| $q_m$ (mg/g) | $K_L$  | $R^2$ | $K_f$      | n    | $R^2$ |
| 1610         | 0.0184 | 0.992 | 63.82      | 1.87 | 0.953 |

Table S2 Adsorption parameters of isotherm for CR adsorption on MgO-dhp

| Langmuir     |        |       | Freundlich |      |       |
|--------------|--------|-------|------------|------|-------|
| $q_m$ (mg/g) | $K_L$  | $R^2$ | $K_f$      | n    | $R^2$ |
| 1626         | 0.0196 | 0.993 | 71.62      | 1.93 | 0.955 |

Table S3 Adsorption parameters of kinetics for CR adsorption on MgO-hex

| Initial concentration (mg/L) | Pseudo-first-model        |                         |                  |       | Pseudo-second-model       |                         |                  |       |
|------------------------------|---------------------------|-------------------------|------------------|-------|---------------------------|-------------------------|------------------|-------|
|                              | Experimental $q_e$ (mg/g) | Calculated $q_e$ (mg/g) | $K_1$ (g/mg/min) | $R^2$ | Experimental $q_e$ (mg/g) | Calculated $q_e$ (mg/g) | $K_2$ (g/mg/min) | $R^2$ |
| 100                          | 147.4                     | 138.5                   | 0.0165           | 0.992 | 147.4                     | 148                     | 0.0156           | 0.999 |
| 300                          | 449                       | 376.5                   | 2.4657           | 0.960 | 449                       | 411.5                   | 0.0007           | 0.999 |
| 700                          | 1146.9                    | 1116.9                  | 1.5926           | 0.995 | 1146.9                    | 1150                    | 0.0009           | 0.999 |
| 1000                         | 1380                      | 1347.1                  | 1.7563           | 0.997 | 1380                      | 1380                    | 0.0008           | 0.999 |

Table S4 Adsorption parameters of kinetics for CR adsorption on MgO-dhp

| Initial concentration (mg/L) | Pseudo-first-model        |                         |                  |       | Pseudo-second-model       |                         |                  |       |
|------------------------------|---------------------------|-------------------------|------------------|-------|---------------------------|-------------------------|------------------|-------|
|                              | Experimental $q_e$ (mg/g) | Calculated $q_e$ (mg/g) | $K_1$ (g/mg/min) | $R^2$ | Experimental $q_e$ (mg/g) | Calculated $q_e$ (mg/g) | $K_2$ (g/mg/min) | $R^2$ |
| 100                          | 150                       | 145                     | 1.6966           | 0.993 | 150                       | 147.1                   | 0.0045           | 0.999 |
| 300                          | 450                       | 440                     | 2.4879           | 0.976 | 450                       | 450.5                   | 0.0011           | 0.999 |
| 700                          | 1207.8                    | 1119.8                  | 0.3468           | 0.991 | 1207.8                    | 1220                    | 0.0010           | 0.999 |
| 1000                         | 1403                      | 1401.1                  | 0.0567           | 0.882 | 1403                      | 1405                    | 0.0046           | 0.999 |
